# Supplementary material
Source: PubMed Central journal article supplement (PMC11659817)
Supplement: zoolstud-63-015-s001.pdf [file zoolstud-63-015-s001.pdf]

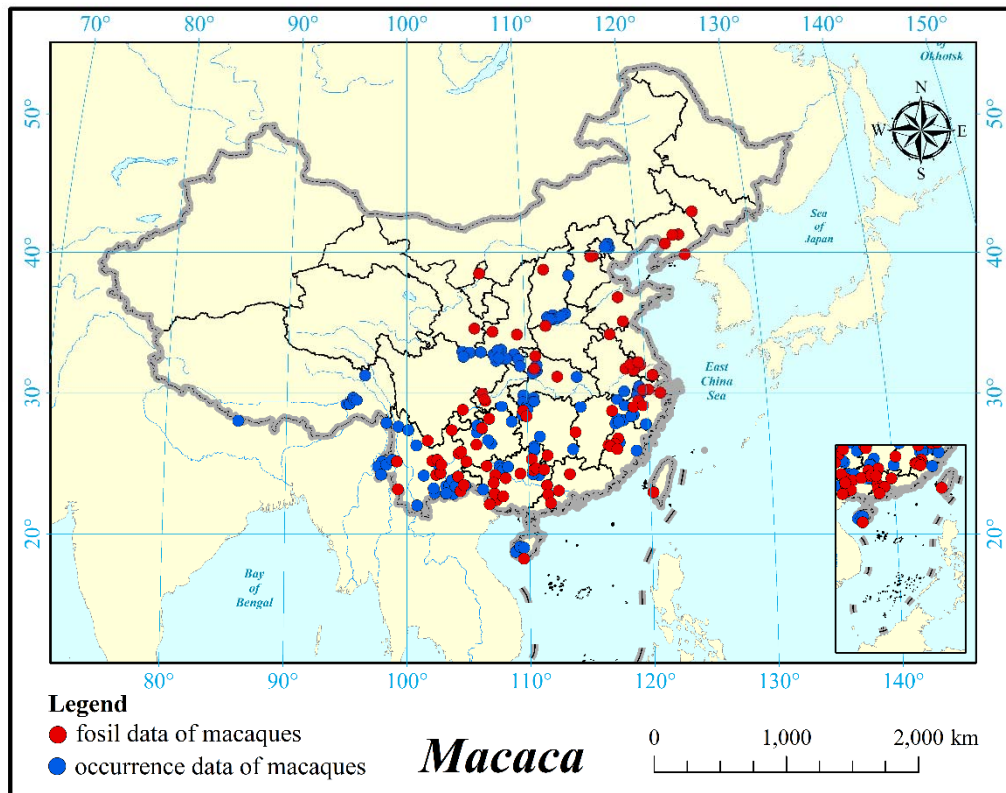

**Fig. S1.** Macaques' fossil locations in the Pleistocene and extant distribution profiles of 1970-2000. Zoological Studies 63:14 (2024).
