# Supplementary material
Source: PubMed Central journal article supplement (PMC11659817)
Supplement: zoolstud-63-015-s002.pdf [file zoolstud-63-015-s002.pdf]

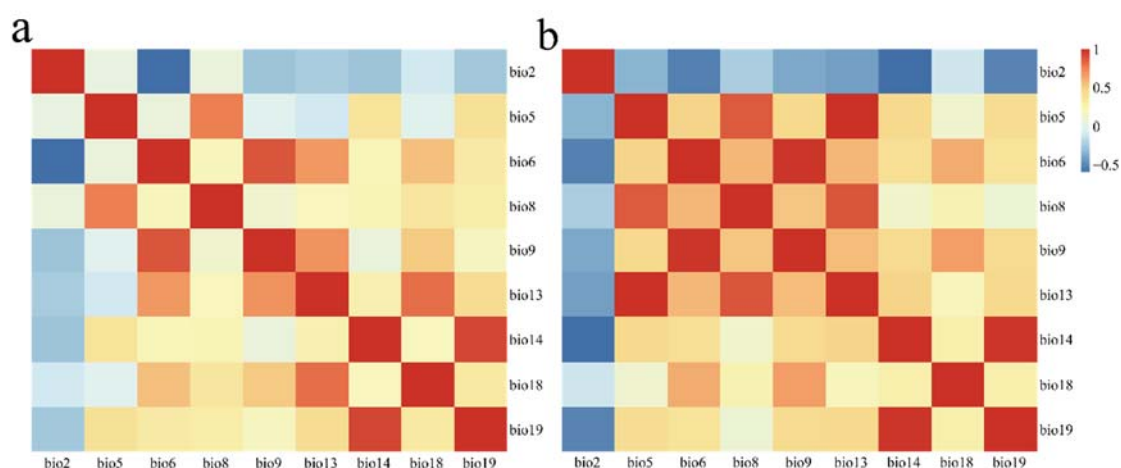

**Fig. S2.** Heatmap for correlation analysis of *bioclimatic variables* (BC)  
Note: a: LIG period; b: 1970-2000 period. bio2: mean diurnal range; bio5: the maximum temperature of the warmest month; bio6: the minimum temperature of the coldest month; bio8: mean temperature of the wettest quarter; bio9: mean temperature of the driest quarter. bio13-bio19 related to the precipitation: bio13: the wettest month; bio14: the driest month; bio18: the warmest quarter; and bio19: the coldest quarter.
