# Supplementary material
Source: PubMed Central journal article supplement (PMC11659817)
Supplement: zoolstud-63-015-s004.pdf [file zoolstud-63-015-s004.pdf]

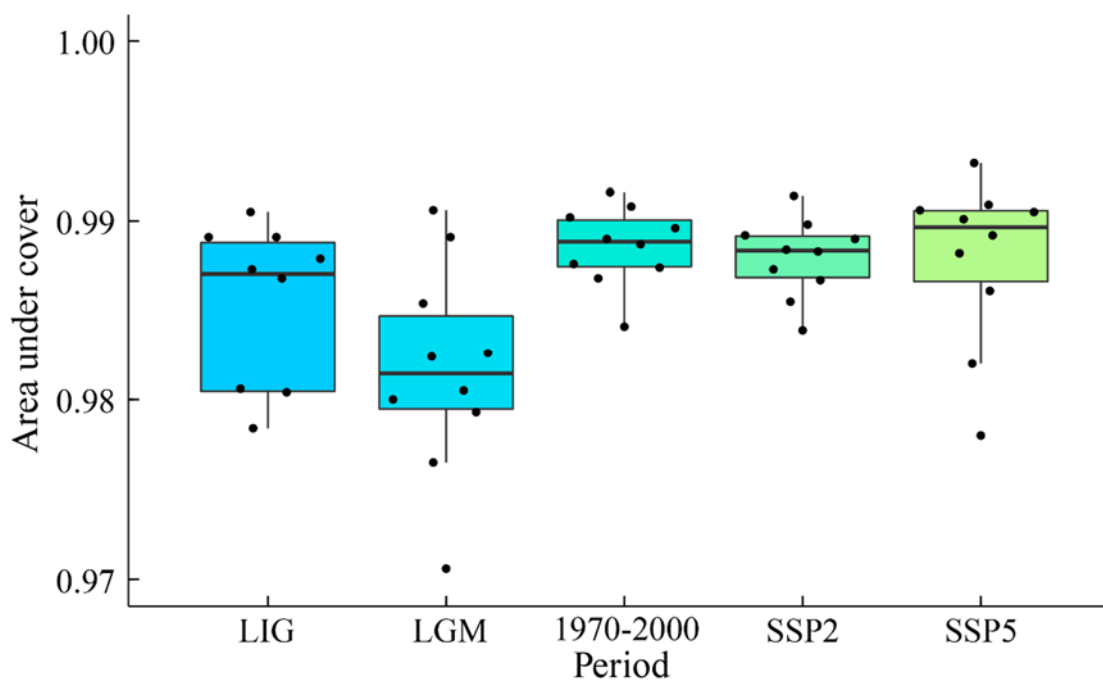

**Fig. S4.** Precision evaluation of MaxEnt model for the five periods. Model accuracy was assessed by 10-fold cross-validation. All models' mean  $AUC_{TEST}$  values are greater than required for a significant threshold of the random prediction (0.5), implying the modeled predictions are "excellent." As for LIG and LGM, the mean  $AUC_{TEST}$  is  $0.983 \pm 0.010$  and  $0.982 \pm 0.006$ , respectively. The same values are  $0.989 \pm 0.002$  for 1970-2000;  $0.988 \pm 0.002$  for SSP2; and  $0.988 \pm 0.004$  for SSP5.
