# Supplementary material
Source: PubMed Central journal article supplement (PMC11659817)
Supplement: zoolstud-63-015-s007.pdf [file zoolstud-63-015-s007.pdf]

**Table S1.** BC, LU and HP variables selected for this study

| Type | Code  | Variables                                                 | Units                            |
|------|-------|-----------------------------------------------------------|----------------------------------|
| BC   | var1  | Mean diurnal range <sup>1,2</sup>                         | °C                               |
|      | var2  | The maximum temperature of the warmest month <sup>1</sup> | °C                               |
|      | var3  | The minimum temperature of the coldest month <sup>1</sup> | °C                               |
|      | var4  | Mean temperature of the wettest quarter <sup>1</sup>      | °C                               |
|      | var5  | Mean temperature of driest quarter <sup>2</sup>           | °C                               |
|      | var6  | Precipitation of the wettest month <sup>1,2</sup>         | mm                               |
|      | var7  | Precipitation of the driest month <sup>1,2</sup>          | mm                               |
|      | var8  | Precipitation of the warmest quarter <sup>1,2</sup>       | mm                               |
| LU   | var9  | Forested primary land <sup>2</sup>                        | %                                |
|      | var10 | Non-forested primary land <sup>2</sup>                    | %                                |
|      | var11 | Potentially forested secondary land <sup>2</sup>          | %                                |
|      | var12 | Potentially non-forested secondary land <sup>2</sup>      | %                                |
|      | var13 | Rangeland <sup>2</sup>                                    | %                                |
|      | var14 | Urban land <sup>2</sup>                                   | %                                |
|      | var15 | Secondary mean biomass density <sup>2</sup>               | kg C/m <sup>2</sup>              |
| HP   | var16 | Human population density <sup>2</sup>                     | number of people/km <sup>2</sup> |

Note: var1 to 8 are BC variables; var9 to 15 represent LU variables; and var16 is HP variable. <sup>1</sup>: the variables used in models for LIG and LGM periods; and <sup>2</sup>: the variables utilized for the models for 1970-2000 and 2050s.
