# Supplementary material
Source: PubMed Central journal article supplement (PMC11659817)
Supplement: zoolstud-63-015-s008.pdf [file zoolstud-63-015-s008.pdf]

**Table S2.** The optimized parameters of MaxEnt models generated by ENMeval\*

| Optimized model parameters | LIG | LGM | 1970-2000 | 2050s |      |
|----------------------------|-----|-----|-----------|-------|------|
|                            |     |     |           | SSP2  | SSP5 |
| FC                         | LQP | LQP | LQPT      | LQPT  | LQPT |
| RM                         | 1   | 1   | 4         | 3     | 3    |

\*: FC represents feature class, RM is regularization multiplier, AICc is the corrected Akaike information criterion. As for LIG and LGM, their minimum information criterion ( $\Delta AICc$ ) is 0; FC=LQP; and RM is 1. Therefore, the two models can be regarded as the most optimal. Concerning the models based on BC-LU-HP variables for 1970-2000, the corresponding parameters are LQPT (4), and for SSP2 and SSP5, the corresponding parameters are LQPT (3).
