# Supplementary material
Source: PubMed Central journal article supplement (PMC11659817)
Supplement: zoolstud-63-015-s009.pdf [file zoolstud-63-015-s009.pdf]

**Table S3.** Overlapping area (km<sup>2</sup>) and proportion (%) both core areas (highly suitable areas) and total suitable areas against protected areas (PAs)

|                                                    | 1970-2000          |                    | SSP2               |                    | SSP5              |                    |
|----------------------------------------------------|--------------------|--------------------|--------------------|--------------------|-------------------|--------------------|
|                                                    | HSH                | SH                 | HSH                | SH                 | HSH               | SH                 |
| Within PAs<br>(×10 <sup>4</sup> km <sup>2</sup> )  | 5.78<br>(5.09%)    | 13.91<br>(3.92%)   | 5.20<br>(4.18%)    | 13.80<br>(3.79%)   | 4.50<br>(5.40%)   | 14.20<br>(4.14%)   |
| Outside PAs<br>(×10 <sup>4</sup> km <sup>2</sup> ) | 107.78<br>(94.91%) | 341.02<br>(96.08%) | 119.13<br>(95.82%) | 355.00<br>(96.21%) | 78.83<br>(94.60%) | 334.31<br>(96.21%) |
| Total<br>(×10 <sup>4</sup> km <sup>2</sup> )       | 113.56             | 354.93             | 124.33             | 368.80             | 83.33             | 348.51             |

Abbreviations: HSH — highly suitable areas; SH — suitable habitat; PAs — protected areas.
